# 1 **Social networks with strong spatial embedding generate non-standard epi-** 2 **demic dynamics driven by higher-order clustering**

3 David J. Haw<sup>1a</sup>, Rachael Pung<sup>1a</sup>, Jonathan M. Read<sup>2</sup>, Steven Riley<sup>1\*</sup>

4 1. MRC Centre for Outbreak Analysis and Modelling, Department of Infectious Disease  
5 Epidemiology, School of Public Health, Imperial College London, London, UK

6 2. Centre for Health Informatics Computing and Statistics, Lancaster Medical School, Lan-  
7 caster University, Lancaster, UK

8 <sup>a</sup> \*Corresponding author. Email address [s.riley@imperial.ac.uk](mailto:s.riley@imperial.ac.uk)

## 9 10 **Abstract**

11 Some directly transmitted human pathogens such as influenza and measles generate sustained  
12 exponential growth in incidence, and have a high peak incidence consistent with the rapid de-  
13 pletion of susceptible individuals. Many do not. While a prolonged exponential phase typically  
14 arises in traditional disease-dynamic models, current quantitative descriptions of non-standard  
15 epidemic profiles are either abstract, phenomenological or rely on highly skewed offspring dis-  
16 tributions in network models. Here, we create large socio-spatial networks to represent contact  
17 behaviour using human population density data, a previously developed fitting algorithm, and  
18 gravity-like mobility kernels. We define a basic reproductive number  $R_0$  for this system anal-  
19 ogous to that used for compartmental models. Controlling for  $R_0$ , we then explore networks  
20 with a household-workplace structure in which between-household contacts can be formed with  
21 varying degrees of spatial correlation, determined by a single parameter from the gravity-like  
22 kernel. By varying this single parameter and simulating epidemic spread, we are able to iden-  
23 tify how more frequent local movement can lead to strong spatial correlation and thus induce  
24 sub-exponential outbreak dynamics with lower, later epidemic peaks. Also, the ratio of peak  
25 height to final size was much smaller when movement was highly spatially correlated. We in-  
26 vestigate the topological properties of our networks via a generalized clustering coefficient that  
27 extends beyond immediate neighbourhoods, identifying very strong correlations between 4th  
28 order clustering and non-standard epidemic dynamics. Our results motivate the joint observa-  
29 tion of incidence and socio-spatial human behaviour during epidemics that exhibit non-standard  
30 incidence patterns.

## 31 **Author Summary**

32 Epidemics are typically described using a standard set of mathematical models that do not  
33 capture social interactions or the way those interactions are determined by geography. Here we  
34 propose a model that can reflect social networks influenced strongly by the way people travel  
35 and we show that they lead to very different epidemic profiles. This type of model will likely  
36 be useful for forecasting.

## 37 Introduction

38 Epidemics are frequently conceptualized as resulting from the transmission of a pathogen across  
39 a network. Directly transmitted pathogens propagate through susceptible human populations  
40 and create directed infection trees with an offspring-like process [15]. Each node may be a  
41 different type (e.g. children may be more infectious than adults [42]) and individuals with  
42 many contacts are more likely to cause infection than those with fewer contacts [24]. Although  
43 difficult to observe, infection trees describe a real biological process: these pathogens do not  
44 reproduce outside of a human host, so the founding pathogen population for an infectee comes  
45 directly from their infector. Further, we can conceptualise that infection trees occur when a  
46 true offspring process is constrained to pass through a social network [3, 40], with infection  
47 occurring according to a specified probability when an edge exists between a susceptible and  
48 an infectious individual.

49 The properties of different contact network types can be described by distributions associated  
50 with their topology [40]. First order network properties are associated with first order connec-  
51 tions, as defined by the degree distribution. For finite random networks of reasonable size, the  
52 degree distribution is well-approximated by a Poisson in which variance is equal to the square of  
53 the mean. In contrast, for finite scale-free networks, the offspring distribution is power law-like  
54 with a much higher variance. Further, distributions of second order phenomena describe con-  
55 nections of length two. For example, the local clustering coefficient is a second order property,  
56 defined to be the neighbourhood density of a given node [40]. For a limited set of network types,  
57 we can use analytical expressions for higher moments of the degree distribution to calculate key  
58 properties of their potential epidemics, such as the probability of epidemic establishment and  
59 cumulative incidence [22, 28]. Although these higher order moments are tractable for some spe-  
60 cial cases, they are seldom the primary target of theoretical studies. Semi-empirical networks  
61 that arise from detailed simulations [11] may have complex higher moments, however their im-  
62 pact on epidemic dynamics is obscured by the variance of their offspring distribution e.g. [25].  
63 Here, we explicitly control our network generation algorithm so as to have non-trivial higher  
64 order structure whilst maintaining a Poisson degree distribution and a pre-specified clustering  
65 coefficient.

66 Epidemics can also be understood in terms of compartmental models, which are more tractable  
67 mathematically, and are equivalent to large network models with very simple topologies [35].  
68 Key features of epidemic incidence curves is are often explained by dynamics associated with  
69 these models [1, 19]. Numerical solutions to multi-type SIR-like compartmental models are  
70 easier to obtain than for many topologies of network and can explain: the initial growth phase  
71 [30], the timing and amplitude of the peak [43], epidemic duration [21] and the total number  
72 of cases [17]. These models can efficiently describe many different types of complexity, such  
73 as age-specific susceptibility and transmissibility [16], behavioural risk groups [4] and, with  
74 increasing frequency, geographical location [34].

75 The basic reproductive number has been defined for both compartmental models and for net-  
76 work models. For compartmental models, the reproduction number is conditional on the system  
77 having a well defined period of exponential growth [18] and is defined as the average number  
78 of new infections generated by a typically infectious individual in an otherwise infectious pop-  
79 ulation [18]. The word "typically" is somewhat overloaded in this definition: during the expo-  
80 nential phase, a system with heterogeneous population will reach a steady-state distribution of  
81 infectives, corresponding to the eigenstate of the renewal process.

82 For network models, the basic reproduction number is most frequently defined as the expected

83 ratio of cases between the first (seed) and second generations of infection. In homogeneous  
84 networks, this is equal to the product of the average degree and the probability of transmission  
85 per link per generation. However, many studies of epidemics on networks involve high vari-  
86 ance degree distributions [26, 25], and so this quantity must be modified to account for excess  
87 degree [26, 27]. Here, we use  $R^*$  to denote the expected first generation ratio *if a network is*  
88 *homogeneous*, defined to be the expected number of cases in the second generation divided by  
89 the number in the first generation. Our  $R^*$  is therefore consistent with  $\rho_0$  as defined in [26],  
90 although we choose not to adjust for over-dispersion, because we condition our network con-  
91 struction on this distribution having low variance.

92 The reproduction number for networks has also been defined to be more consistent with its  
93 definition for compartmental models. In [37]  $R_*$  was defined as an asymptotic property of  
94 epidemics that were guaranteed to have an exponential phase when they occurred on infinitely  
95 large networks. We define our  $R_0$  to be a finite-network approximation to this  $R_*$  in [37]. This  
96  $R_0$  is well-defined during periods of exponential growth.

97 Both compartmental and network models can be embedded in space [34]. Each node can have a  
98 location in space while each compartment can refer to a single unit of space. Node density can  
99 be assigned according to known population densities and compartments can be assigned equal  
100 spatial areas but different numbers of hosts. In general, the risk of infection passing between two  
101 people decreases as the distance between their home location increases. The propensity of nodes  
102 to form links across space or for infection to spread between compartments can be quantified  
103 using mobility models borrowed from geography [12], such as the gravity and radiation models.  
104 Here, we are specifically interested in how the overall topology of a spatially-embedded network  
105 model can be driven by different movement assumptions and thus drive the gross features of the  
106 epidemics that occur on the network.

## 107 Results

108 We used an existing variant of the Metropolis-Hastings algorithm [35] to create a spatially-  
109 embedded bipartite network of homes and workplaces consistent with the population density of  
110 Monrovia, Liberia, and with three illustrative movement scenarios (SI Appendix, Fig S1). An  
111 individual's propensity to choose a given workplace was determined by the distance between  
112 their home and workplace and parameters of a gravity-like kernel. The kernel was inversely  
113 proportional to distance raised to the power  $\alpha$ , with movement scenarios generated solely by  
114 changing the value of  $\alpha$ : a control value  $\alpha = 0$  that removed the embedding and produced a *non-*  
115 *spatial* model; a *wide* kernel with  $\alpha = 3$  typical of developed populations [35, 38]; and a *highly*  
116 *local* kernel with  $\alpha = 6$  representing less developed populations (SI Appendix, Fig S1 part  
117 C compared with rural Huangshan in Ref [14]). The resulting distributions of distances from  
118 home to work were driven strongly by our choice of  $\alpha$ , with 95% of journeys: less than 24.12km  
119 for  $\alpha = 0$ ; less than 12.91km for  $\alpha = 3$ ; and less than 6.68km for  $\alpha = 6$ . Workplace links  
120 were dissolved into links between individuals in different households resulting in a network of  
121 cliques (households) that were linked according to  $\alpha$ .

122 The choice of movement kernel used to create the household-workplace networks affected gross  
123 features of simulated epidemics, even when controlling for other aspects of the network topol-  
124 ogy (Fig 1). Unipartite contact networks between households were obtained from the bipartite  
125 network of households and workplaces and were dependent on three parameters: mean house-  
126 hold size  $h$ , mean number of workplace links  $v$ , and probability of forming a link in the work-  
127 place  $p_w$ . The mean workplace size  $w$  and mean degree of the network were determined by  
128 these parameters:  $w = v/p_w + 1$ ,  $\langle k \rangle = h - 1 + v$ . Across a broad range of plausible values for

129  $h$ ,  $v$  and  $p_w$ , very local movement ( $\alpha = 6$ ) produced later epidemics than did typical developed-  
130 population movement ( $\alpha = 3$ ) or spatially random mixing ( $\alpha = 0$ , Fig 1A). Similarly, time  
131 to extinction was later for very local movement ( $\alpha = 6$ ) compared with more frequent longer-  
132 distance movement ( $\alpha = 3$ ) or the absence of spatial embedding ( $\alpha = 0$ ). We calculate the  
133 coefficient of variation of the degree distribution  $C_V^2 = \langle k^2 \rangle / \langle k \rangle - 1 \sim 0.1$  for each network,  
134 independently of  $\alpha$  [26].

135 Each simulation is assigned a value of  $R^*$ , the average number of cases in the first generation per  
136 seed infection. For moderate-to-high values of the first generation ratio  $R^*$ , there was very little  
137 difference in the final size of the outbreak for the different movement assumptions. However,  
138 for low values of  $R^* < 1.8$ , the average final size of the outbreak was substantially smaller  
139 for more local kernels. This was driven by a higher probability of extinction when more local  
140 movement was assumed. The difference in final size driven by  $\alpha$  was no longer present when  
141 we controlled for extinction (SI Appendix, Fig S2).

142 The choice of movement scenario had a substantial impact on peak incidence, even when  $R^*$   
143 was high and there was little difference in the final sizes (Fig 1B, Fig 2 rows 1 and 2). For  
144 example, for parameters with first generation ratios in the range [1.8, 2.2], average peak daily  
145 incidence as a fraction of the total population was  $6.5 \times 10^{-3}$  for random spatial movement,  
146  $5.4 \times 10^{-3}$  for movement assumptions typical of developed populations and  $3.0 \times 10^{-3}$  when  
147 highly local movement was assumed. The relationship between peak height and first generation  
148 ratio appeared to be strongly linear, with correlation coefficients 0.9778, 0.9826 and 0.9806 for  
149  $\alpha = 0$ , 3 and 6 respectively.

150 The relationship between peak incidence and final size for the three movement scenarios illus-  
151 trates further how the topology of an embedded network could directly affect gross features of  
152 an epidemic. Peak incidence is observed prior to final size during an epidemic. For the same  
153 peak height, local movement gave substantially larger final sizes. For peak daily incidences  
154 in the range  $[3 \times 10^{-3}, 6.5 \times 10^{-3}]$  the final size of the outbreak was 68% when random spa-  
155 tial movement was assumed, 74% when movement was assumed to be typical of developed  
156 populations and 84% when highly-local movement was assumed.

157 For all movement scenarios, the basic reproductive number  $R_0$  was smaller than the first gener-  
158 ation ratio  $R^*$  and different from the expected number of secondary cases generated by a single  
159 seed in an otherwise susceptible population. The duration of the exponential phase can be seen  
160 when incidence is plotted on a log scale: a constant gradient of log incidence is evidence of  
161 exponential growth (Figure 2, third row). However, in a network model with clearly defined  
162 generations, the generation ratio can also be used to define exponential growth: if the ratio of  
163 incidence between generation  $n + 1$  and  $n$  is the same as the ratio between generations  $n$  and  
164  $n - 1$ , then we can claim to have identified a period of exponential growth (Methods, Fig 2).  
165 The value of that constant observed ratio is the basic reproductive number  $R_0$  [18].

166 Incidence grew exponentially for a much shorter time for highly-local movement than it did for  
167 a wider movement kernel, or for non-spatial networks, even when we controlled for  $R_0$  to be  
168 within a narrow range (e.g. (2, 2.2], Fig 2). Despite this being a relatively large population,  
169 there was no obvious period of exponential growth when we assumed highly local movement.  
170 Therefore, given that the basic reproductive number is defined for a genuine renewal process –  
171 and its implied exponential growth [18] – it could be argued that  $R_0$  does not exist for some of  
172 these networks for our model parameters. However, we did assign a value of  $R_0$  for all simu-  
173 lations based on the most similar subset of consecutive early generations (see Methods). The  
174 amplitude of the difference was not driven in any obvious way by the underlying assumptions

175 used to create the networks. These patterns were not specific to the range of values for  $R_0$  (SI  
176 Appendix, Figs. S3, S4, S5).

177 Analysis of the higher-order structure of the networks suggests that movement scenarios were  
178 driving the observed characteristics of epidemics such as peak timing and attack rate via in-  
179 creased fourth order clustering. We use the term first order clustering for the quantity typically  
180 described as the local clustering coefficient [40]: the link density of the immediate neighbour-  
181 hood of a given node. By extension, we defined order- $m$  clustering coefficient to be the expected  
182 proportion of neighbours within  $m$  steps on the network who were also neighbours of each other  
183 within  $m$  steps (Fig 3). We found no relationship between our assumed pattern of movement ( $\alpha$ )  
184 and first or second order clustering coefficients. There was a weak relationship between  $\alpha$  and  
185 third order clustering and then a very strong relationship between  $\alpha$  and fourth order clustering.  
186 Patterns between epidemic properties and fourth order clustering for individuals were similar  
187 to those between epidemic properties and second order clustering of households, as would be  
188 expected, given the bipartite algorithm used to create individual-level networks.

189 Final size increased with spatial correlation, despite peak size displaying the opposite trend for  
190 controlled  $R^*$  or  $R_0$ . There was a strong linear relationship between order- $m$  clustering and  
191 peak size/final size, that could be explained by  $\alpha$ , the strength of spatial embedding, when we  
192 control for  $R_0$  (Fig 4B). The gradient of the relationship decreased with order of clustering.  
193 Second order household clustering showed the same relationship with peak size as did fourth  
194 order individual clustering (Fig 4C). These strong linear relationships only existed when we  
195 effectively control for  $R_0$ , rather than  $R^*$ , and became less noisy when we reduced the interval  
196 used to define  $R_0$ .

197 We conducted a number of sensitivity analyses for these network simulation results. Analytic  
198 approximations for degree distribution  $P(K = k)$  and expected first order clustering  $\langle CC^1 \rangle$   
199 in our networks are given in Protocol S1, and are independent of  $\alpha$ . We confirmed these re-  
200 lationships in SI Appendix Figure S6 by computing these quantities on a set of networks that  
201 differ in  $\alpha$ . SI Appendix Figure S7 shows the relationship between  $\alpha$  and clustering order 1  
202 to 4 on networks generated using a uniform population density. SI Appendix Figure S8 shows  
203 the relationship between order- $m$  clustering  $CC^m$  and peak size for different values of  $R_0$ . SI  
204 Appendix Figure S9 shows clustering order 1 to 4 on networks with different  $h$ ,  $w$  and  $p_w$ , and  
205 SI Appendix Figure S10 provides an illustration of the relationship between higher-order clus-  
206 tering and rewiring probability on a commonly used network model with spatial embedding:  
207 the Watts-Strogatz Small World Network [40].

208 Finally, we map our network model onto a deterministic metapopulation framework so as to  
209 relate our simulations of incidence to prior analytic approximations of travelling spatial waves  
210 (Protocol S1 for analytic construction). Figure 5 shows the results of simulating on a grid of  
211 evenly spaced households of size  $h = 4$ , where a single continuous variable describes preva-  
212 lence in each household, and spatial coupling between households used in the force of infection  
213 is exactly the kernel used in the construction of our spatially embedded networks. We simulate  
214 with randomly spaced seeds (as above), and with a central seed (the center most 4 households),  
215 tracking global incidence and local time of peak incidence. The former case yields global in-  
216 cidence curves similar to those generated in our network model (which was seeded similarly).  
217 The latter case allows us to identify 4 distinct stages in the propagation of spatial waves that  
218 contribute to observed sub-exponential outbreak dynamics in more complex, network-based  
219 systems. SI Appendix Figure S11 shows local peak timing in each case, and SI Appendix  
220 Figure S12 shows simulation results in 1 spatial dimension with  $\alpha = 6$  and  $\alpha = 12$ , along-



221 side statistical properties of prevalence, which further clarify these growth phases (c.f. figure  
222 captions for details and SI Appendix Protocol S1 for mathematical analysis).

## 223 Discussion

224 We have shown that non-standard epidemic dynamics can arise from strongly spatially embed-  
225 ded social networks. Using a flexible algorithm of assigning individuals to households and  
226 then creating a social networks with widely varying topologies, we can explain the absence of  
227 exponential growth and increased attack rate for a given peak height in terms of higher order  
228 social structure, while maintaining a standard low-variance offspring distribution. We observe  
229 consistent patterns when we control for the basic reproductive number, as measured as directly  
230 as possible from a constant ratio of incidence between generations.

231 The algorithm we used [35] captures the key social contexts of home and workplace while  
232 using few parameters, which has allowed us to isolate specific relationships within the epidemic  
233 dynamics, across a broad range of network topologies. However, its simplicity is a potential  
234 limitation. Specifically, an individual only belongs to a single workplace (which may represent  
235 a school or social club). In reality, people will gather non-household contacts from a variety of  
236 sources. Also, our networks are not dynamic, which may limit the generalisability of the results  
237 to short generation time pathogens.

238 Accurate empirical data about higher order social contacts would allow us to address some of  
239 these issues. There are a number of different approaches to gathering social contact data, in-  
240 cluding contact diaries, mobile phone apps and tag-based location tracking [31]. Diary methods  
241 and current analytical approaches can provide accurate estimates of 1st order moments (degree  
242 distribution [32]) and valuable insights into second order moments (clustering [44]). However,  
243 these data and current analytical approaches are limited for the estimation of higher order mo-  
244 ments. It seems likely that either high resolution mobile phone location data [7] or very high  
245 coverage tag-based studies will be needed to reveal these patterns [6]. In addition, further work  
246 is needed on the use of algorithms similar to that used here to explicitly fit fully enumerated  
247 social networks to egocentric sample data from a subset of the population (or low coverage  
248 non-egocentric data) [23].

249 Our results can be compared with other disease-dynamic models that produce non-standard in-  
250 cidence profiles. Different functional forms have been suggested for the force-of-infection term  
251 in compartmental models that give polynomial growth in the early stages of an epidemic [8, 18].  
252 However, the key features of these model structures may be captured by a more straightforward  
253 underlying process [20]. Faster than exponential growth can be achieved with very high vari-  
254 ance offspring distributions, which have been inferred by diary studies of social contacts [25].  
255 There is also an extensive literature of much more abstract grid-based models of infectious  
256 disease that produce non-standard epidemic dynamic because of very local spatial processes  
257 (cellular automata [41]). We note that short periods of super-exponential growth were observed  
258 in our results for the simplified 2 dimensional metapopulation example (Fig 5B), arising from  
259 from accelerating spatial waves of incidence, not driven by the variance of the offspring distri-  
260 bution.

261 Prospective forecasting of infectious disease incidence during outbreaks [29] and seasonal epi-  
262 demics [2] is an active area of public health research. Although non-mechanistic [13] and  
263 simple compartmental models [33, 39] have proven most reliable up to now, modern computing  
264 capacity enables studies to explore the possibility that incidence forecasts can be improved by  
265 the incorporation of realistic social network topology [36, 9]. For example, incidence of Ebola

266 in west Africa in 2013-2016 and currently in central Africa exhibits strong spatial clustering and  
267 highly non-standard incidence dynamic, with short periods of exponential growth followed by  
268 low sustained peaks in incidence [10]. Future forecasting studies should explore the possibility  
269 that that sparse population density and short distances between contacts result in higher-order  
270 clustering in the social networks and the resulting non-standard incidence profiles.

## 271 **Methods**

### 272 **The Model**

273 We simulate 10 independent epidemics for each of 200 parameter sets  $(h, v, p_w, R^*)$  drawn from  
274 a Latin hypercube, each seeded in 10 randomly selected individuals, and for each  $\alpha = 0, 3, 6$ .  
275 The ranges of values used in the Latin hypercube are given in SI Appendix, Table S1, and  
276 complete parameter sets for all networks are given in SI Appendix, Table S1. Our simulations  
277 allowed us to track disease incidence and disease generation of each infection.

278 We simulate an epidemic on the network to reflect the natural history of Ebola, with a latent pe-  
279 riod of 9.7 days and a serial interval of 15.3 days. The generation time was calibrated by varying  
280 the relative infectiousness of a short period before the onset of symptoms. Global transmissi-  
281 bility  $\beta$  is tuned to the value of  $R^*$  drawn from the Latin hyper-cube. For each timestep, the  
282 probability of infection is calculated for each edge in the network. The algorithm progresses in  
283 real time with small timesteps so it can be compared with results from compartmental models.  
284 Details of the network simulation algorithm are given in [35] and all results can be repro-  
285 duced in the Ebola scenario in the `id_spatial_sim` repository [5], using scripts `ebola_build.sh`  
286 and `ebola_run.sh`.

### 287 **Assigning $R_0$ to each simulation**

288 For each simulation output, we calculate the mean reproductive ratio for each generation. For  
289 generations 1 to 9 and for each possible consecutive string of 3, 4 or 5 values, we perform a  
290 linear regression fit. We define  $R_0$  as mean reproductive ratio over the set of values for which  
291 the gradient of this fit is closest to 0 (and all values the remain larger than 1). This allows us to  
292 assign a value  $R_0$  to every simulation output.

### 293 **Higher order clustering**

294 We compute our higher-order clustering coefficients on a subset of 1000 nodes in each network,  
295 chosen at random. The algorithm involves storing the network structure as lists of neighbours  
296 for each node, and performing an effective contact-tracing procedure. Though it is possible to  
297 compute these metrics for all nodes via successive multiplication of adjacency matrices, this  
298 procedure becomes computationally expensive in higher orders at networks become large.

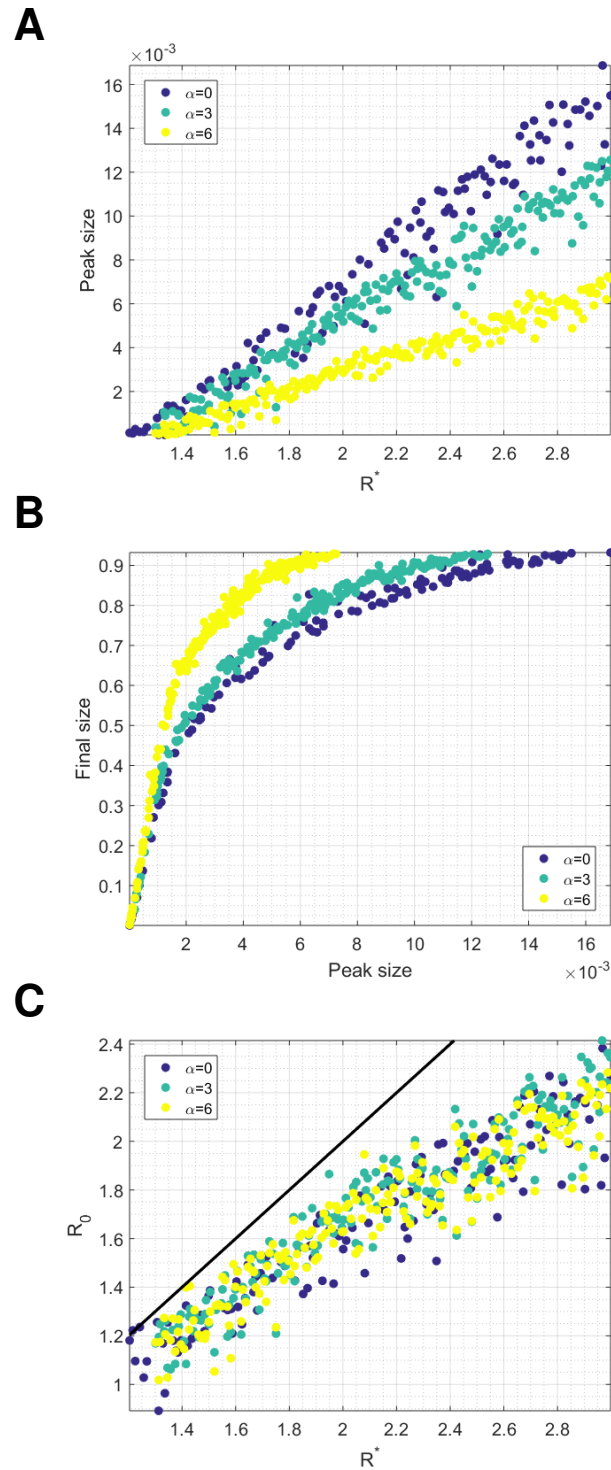

Figure 1: For each set of parameters drawn from the Latin hypercube, and for  $\alpha = 0, 3, 6$ , we show relationships between  $R^*$ ,  $R_0$  time of peak incidence, and epidemic final size: **(A)**  $R^*/$ peak time, **(B)**  $R^*/$ peak size, **(C)**  $R^*/$ extinction time, **(D)**  $R^*/$ final size, **(E)** peak size/final size, **(F)**  $R^*/R_0$  (with the line  $R_0 = R^*$  shown in black).



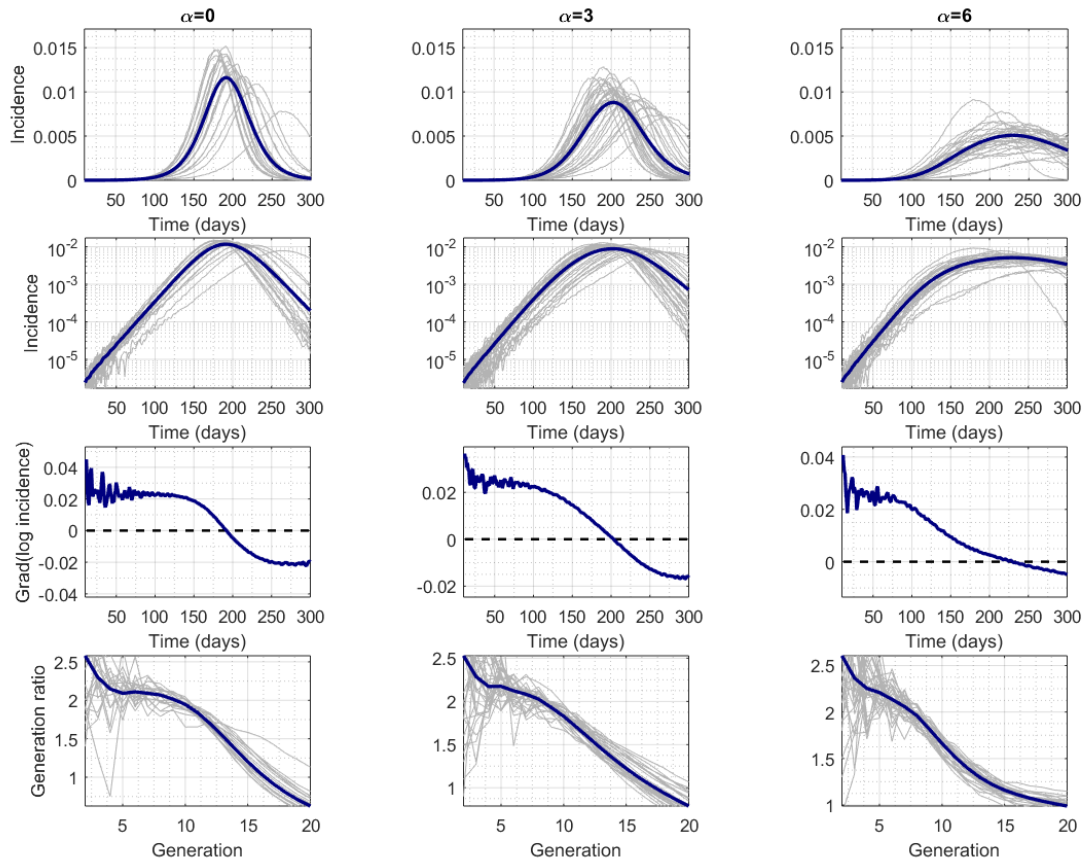

Figure 2: Columns correspond to network structures with  $\alpha = 0, 3$  and  $6$  and simulations with  $R_0 \in (2, 2.2]$ . Exponential growth in real time is indicated by straight lines (second row) and horizontal lines (third row); horizontal lines in bottom row indicate exponential growth by generation. Figures S3 to S5 show results for a wider range of  $R_0$  values for  $\alpha = 0, 3, 6$ .

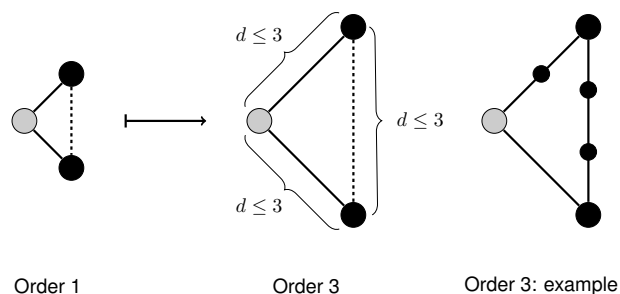

Figure 3: A schematic showing the generalization of clustering coefficient  $C^1$  to higher orders  $CC^m$ :  $CC_i^m$  measures the density of paths of length  $d \leq m$  between the up-to- $m$  neighbours of node  $i$  (where node  $i$  is shown in gray).

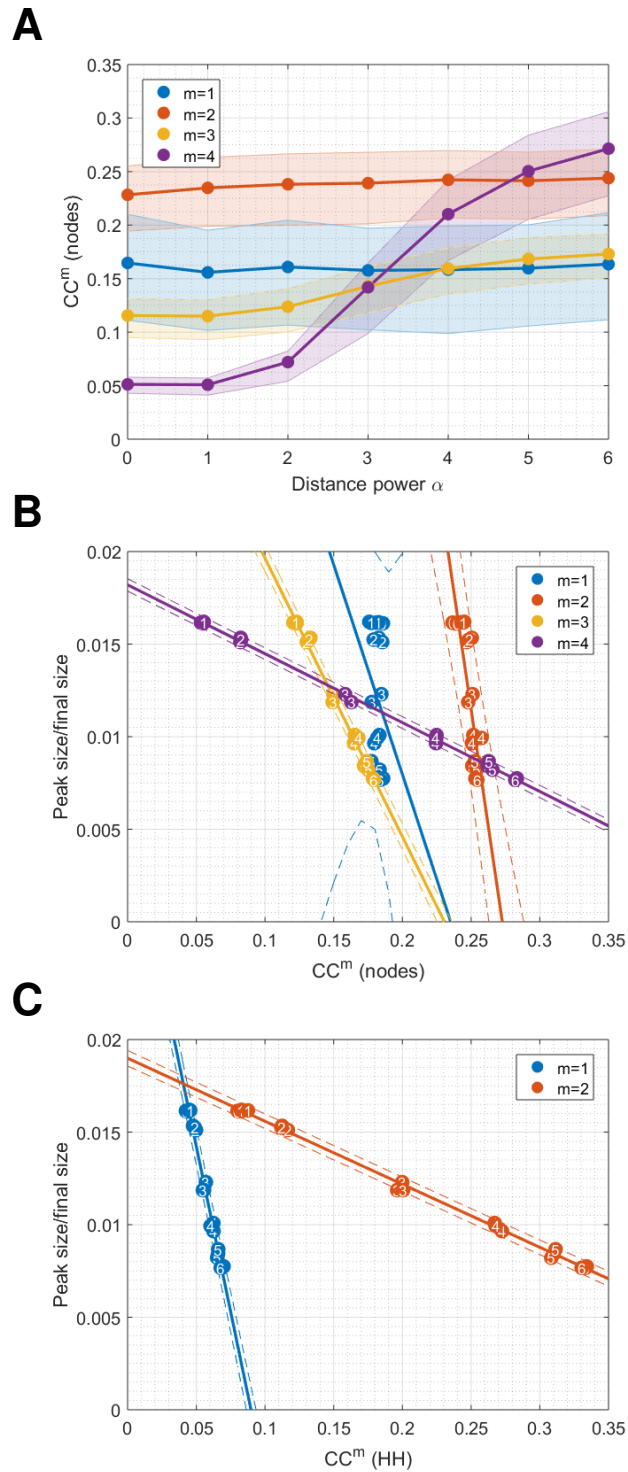

Figure 4: **(A)** 25–, 50– and 75–percentiles of order- $m$  clustering  $CC^m$  on networks constructed with different values of  $\alpha$  and  $h = 5, w = 50, p_w = 0.14, \langle k \rangle = 10$  and  $R_0 \in [2, 2.2)$ . Plot shows mean values over 3 different networks for each parameter set; **(B)** Using peak size as a crude metric for sub-exponential growth (given a fixed range for  $R_0$ ), we see linear trends emerging with higher orders of clustering. Plot shows one point per network, with 3 networks generated for each parameter set, and the mean peak size over 10 independently simulated epidemics, All points are numbered with the corresponding value of  $\alpha$ ; **(C)** Similarly for the household-only networks. Solid lines show linear fits to data, and dotted lines show 95% confidence intervals. Values of linear correlation coefficient and gradient of fits are given in SI Appendix, Table S2.

**A**

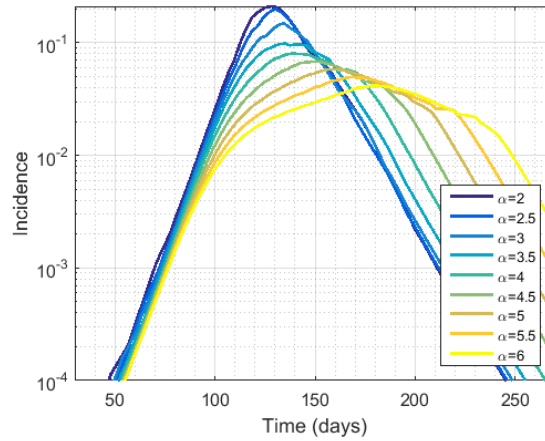

**B**

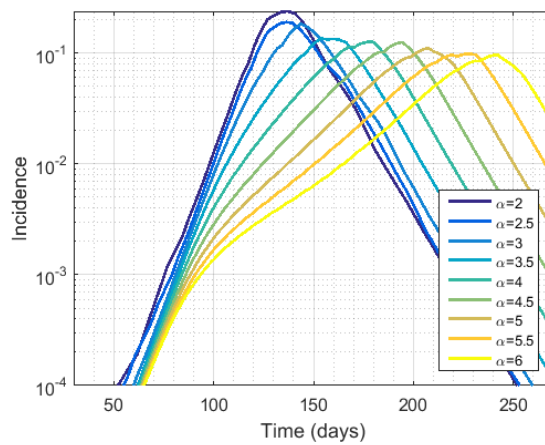

Figure 5: Mean-field approximation with  $R_0 = 2.2$ ,  $\langle k \rangle = 10$ ,  $h = 4$ , using a  $100 \times 100$  grid of uniformly spaced households: **(A)** seeding in 10 randomly selected households (the same households are used in each simulation), and **(B)** seeding in the centre only. Incidence is given as a proportion of the total population for  $\alpha$  ranging from 2 to 6. Supplementary Figure S10 shows time of peak incidence in the case  $\alpha = 6$  seeded as above.

## 299 References

- 300 [1] Roy M Anderson, Robert M May, and B Anderson. *Infectious diseases of humans: dy-*  
301 *namics and control*, volume 28. Wiley Online Library, 1992.
- 302 [2] Matthew Biggerstaff, Michael Johansson, David Alper, Logan C Brooks, Prithwish  
303 Chakraborty, David C Farrow, Sangwon Hyun, Sasikiran Kandula, Craig McGowan,  
304 Naren Ramakrishnan, Roni Rosenfeld, Jeffrey Shaman, Rob Tibshirani, Ryan J Tibshi-  
305 rani, Alessandro Vespignani, Wan Yang, Qian Zhang, and Carrie Reed. Results from the  
306 second year of a collaborative effort to forecast influenza seasons in the United States.  
307 *Epidemics*, February 2018.
- 308 [3] S P Blythe, C Castillo-Chavez, J S Palmer, and M Cheng. Toward a unified theory of  
309 sexual mixing and pair formation. *Math. Biosci.*, 107(2):379–405, December 1991.
- 310 [4] M-C Boily, C Lowndes, and M Alary. The impact of HIV epidemic phases on the ef-  
311 fectiveness of core group interventions: insights from mathematical models. *Sexually*  
312 *Transmitted Infections*, 78(suppl 1):i78–i90, 2002.
- 313 [5] c97sr, kkokwok, dhaw, Erik Volz, and CD-DJ. c97sr/id\_spatial\_sim: Resubmission of  
314 subexp paper, March 2020.
- 315 [6] Ciro Cattuto, Wouter Van den Broeck, Alain Barrat, Vittoria Colizza, Jean-François Pin-  
316 ton, and Alessandro Vespignani. Dynamics of person-to-person interactions from dis-  
317 tributed RFID sensor networks. *PLoS One*, 5(7):e11596, July 2010.
- 318 [7] Eunjoon Cho, Seth A Myers, and Jure Leskovec. Friendship and mobility: User movement  
319 in location-based social networks. In *Proceedings of the 17th ACM SIGKDD International*  
320 *Conference on Knowledge Discovery and Data Mining*, KDD ’11, pages 1082–1090, New  
321 York, NY, USA, 2011. ACM.
- 322 [8] Gerardo Chowell, Lisa Sattenspiel, Shweta Bansal, and Cécile Viboud. Mathematical  
323 models to characterize early epidemic growth: A review. *Physics of Life Reviews*, 18:66–  
324 97, 2016.
- 325 [9] John M Drake, Rajreni B Kaul, Laura W Alexander, Suzanne M O’Regan, Andrew M  
326 Kramer, J Tomlin Pulliam, Matthew J Ferrari, and Andrew W Park. Ebola cases and  
327 health system demand in Liberia. *PLoS Biol.*, 13(1):e1002056, January 2015.
- 328 [10] Ebola Outbreak Epidemiology Team. Outbreak of Ebola virus disease in the Demo-  
329 cratic Republic of the Congo, April-May, 2018: an epidemiological study. *Lancet*,  
330 392(10143):213–221, July 2018.
- 331 [11] Stephen Eubank, Hasan Guclu, V S Anil Kumar, Madhav V Marathe, Aravind Srinivasan,  
332 Zoltán Toroczkai, and Nan Wang. Modelling disease outbreaks in realistic urban social  
333 networks. *Nature*, 429(6988):180–184, May 2004.
- 334 [12] Paul Expert, Tim S. Evans, Vincent D. Blondel, and Renaud Lambiotte. Uncovering space-  
335 independent communities in spatial networks. *Proceedings of the National Academy of*  
336 *Sciences*, 108(19):7663–7668, 2011.
- 337 [13] David C Farrow, Logan C Brooks, Sangwon Hyun, Ryan J Tibshirani, Donald S Burke,  
338 and Roni Rosenfeld. A human judgment approach to epidemiological forecasting. *PLoS*  
339 *Comput. Biol.*, 13(3):e1005248, March 2017.

- 340 [14] Tini Garske, Hongjie Yu, Zhibin Peng, Min Ye, Hang Zhou, Xiaowen Cheng, Jiabing Wu,  
341 and Neil Ferguson. Travel patterns in China. *PLoS One*, 6(2):e16364, February 2011.
- 342 [15] Nicholas C Grassly and Christophe Fraser. Mathematical models of infectious disease  
343 transmission. *Nat. Rev. Microbiol.*, 6(6):477–487, May 2008.
- 344 [16] Jeff Griffiths, Dawn Lowrie, and Janet Williams. Age-structured model for the AIDS  
345 epidemic. *European Journal of Operational Research*, 124(1):1–14, 2000.
- 346 [17] David J Haw, Derek A T Cummings, Justin Lessler, Henrik Salje, Jonathan M Read, and  
347 Steven Riley. Differential mobility and local variation in infection attack rate, 2019.
- 348 [18] J A P Heesterbeek. A brief history of  $R_0$  and a recipe for its calculation. *Acta Biotheor.*,  
349 50(3):189–204, December 2001.
- 350 [19] H W Hethcote. The mathematics of infectious diseases. *SIAM Rev.*, 42(4):599–653, Oc-  
351 tober 2000.
- 352 [20] Thomas House. A general theory of early growth?: Comment on: "Mathematical models  
353 to characterize early epidemic growth: A review" by Gerardo Chowell et al. *Physics of  
354 Life Reviews*, 18:109–111, 2016.
- 355 [21] M. Jesse, P. Ezanno, S. Davis, and J.A.P. Heesterbeek. A fully coupled, mechanistic model  
356 for infectious disease dynamics in a metapopulation: Movement and epidemic duration.  
357 *Journal of Theoretical Biology*, 254(2):331 – 338, 2008.
- 358 [22] Matthew J. Keeling. The effects of local spatial structure on epidemiological invasions.  
359 *Proceedings. Biological sciences / The Royal Society*, 266(1421):859–67, 1999.
- 360 [23] Pavel N Krivitsky and Martina Morris. Inference for social network models from ego-  
361 centrically sampled data, with application to understanding persistent racial disparities in  
362 HIV prevalence in the US. *Ann. Appl. Stat.*, 11(1):427–455, March 2017.
- 363 [24] Kin O Kwok, Benjamin J Cowling, Vivian W I Wei, Kendra M Wu, Jonathan M Read,  
364 Justin Lessler, Derek A Cummings, J S Malik Peiris, and Steven Riley. Social contacts  
365 and the locations in which they occur as risk factors for influenza infection. *Proc. Biol.  
366 Sci.*, 281(1789):20140709–20140709, August 2014.
- 367 [25] Quan-Hui Liu, Marco Ajelli, Alberto Aleta, Stefano Merler, Yamir Moreno, and Alessan-  
368 dro Vespignani. Measurability of the epidemic reproduction number in data-driven contact  
369 networks. *Proceedings of the National Academy of Sciences*, 115(50):12680–12685, 2018.
- 370 [26] Robert M. May and Alun L. Lloyd. Infection dynamics on scale-free networks. *Phys. Rev.  
371 E*, 64:066112, Nov 2001.
- 372 [27] Lauren Ancel Meyers. Contact network epidemiology: bond percolation applied to infec-  
373 tious disease prediction and control. *Bull. Amer. Math. Soc.*, 44(1):63–86, 2007.
- 374 [28] Joel C Miller. Bounding the size and probability of epidemics on networks, 2008.
- 375 [29] Martha I Nelson, James O Lloyd-Smith, Lone Simonsen, Andrew Rambaut, Edward C  
376 Holmes, Gerardo Chowell, Mark A Miller, David J Spiro, Bryan Grenfell, and Cécile Vi-  
377 boud. Fogarty International Center collaborative networks in infectious disease modeling:  
378 Lessons learnt in research and capacity building. *Epidemics*, October 2018.



- 379 [30] Hiroshi Nishiura, Gerardo Chowell, Muntaser Safan, and Carlos Castillo-Chavez. Pros  
380 and cons of estimating the reproduction number from early epidemic growth rate of in-  
381 fluenza a (H1N1) 2009. *Theor. Biol. Med. Model.*, 7:1, January 2010.
- 382 [31] Jonathan M Read, Ken T D Eames, and W John Edmunds. Dynamic social networks and  
383 the implications for the spread of infectious disease. *J. R. Soc. Interface*, 5(26):1001–1007,  
384 January 2008.
- 385 [32] Jonathan M Read, Justin Lessler, Steven Riley, Shuying Wang, Li Jiu Tan, Kin On Kwok,  
386 Yi Guan, Chao Qiang Jiang, and Derek A T Cummings. Social mixing patterns in rural and  
387 urban areas of southern China. *Proceedings Of The Royal Society B-Biological Sciences*,  
388 281(1785):20140268–20140268, June 2014.
- 389 [33] Nicholas G Reich, Logan C Brooks, Spencer J Fox, Sasikiran Kandula, Craig J McGowan,  
390 Evan Moore, Dave Osthus, Evan L Ray, Abhinav Tushar, Teresa K Yamana, Matthew  
391 Biggerstaff, Michael A Johansson, Roni Rosenfeld, and Jeffrey Shaman. A collaborative  
392 multiyear, multimodel assessment of seasonal influenza forecasting in the United States.  
393 *Proc. Natl. Acad. Sci. U. S. A.*, January 2019.
- 394 [34] Steven Riley, Ken Eames, Valerie Isham, Denis Mollison, and Pieter Trapman. Five chal-  
395 lenges for spatial epidemic models. *Epidemics*, 10:68 – 71, 2015. Challenges in Modelling  
396 Infectious Disease Dynamics.
- 397 [35] Steven Riley and Neil M Ferguson. Smallpox transmission and control: spatial dynamics  
398 in Great Britain. *Proc. Natl. Acad. Sci. U. S. A.*, 103(33):12637–12642, August 2006.
- 399 [36] Michele Tizzoni, Paolo Bajardi, Chiara Poletto, José J Ramasco, Duygu Balcan, Bruno  
400 Gonçalves, Nicola Perra, Vittoria Colizza, and Alessandro Vespignani. Real-time numer-  
401 ical forecast of global epidemic spreading: case study of 2009 A/H1N1pdm. *BMC Med.*,  
402 10(1):165, December 2012.
- 403 [37] Pieter Trapman. On analytical approaches to epidemics on networks. *Theoretical Popula-*  
404 *tion Biology*, 71(2):160 – 173, 2007.
- 405 [38] James Truscott and Neil M Ferguson. Evaluating the adequacy of gravity models  
406 as a description of human mobility for epidemic modelling. *PLoS Comput. Biol.*,  
407 8(10):e1002699, October 2012.
- 408 [39] Cécile Viboud, Kaiyuan Sun, Robert Gaffey, Marco Ajelli, Laura Fumanelli, Stefano Mer-  
409 ler, Qian Zhang, Gerardo Chowell, Lone Simonsen, Alessandro Vespignani, and RAPIDD  
410 Ebola Forecasting Challenge group. The RAPIDD Ebola forecasting challenge: Synthesis  
411 and lessons learnt. *Epidemics*, August 2017.
- 412 [40] D J Watts and S H Strogatz. Collective dynamics of 'small-world' networks. *Nature News*,  
413 393(6684):440–442, June 1998.
- 414 [41] S. Hoya White, A. Martín del Rey, and G. Rodríguez Sánchez. Modeling epidemics using  
415 cellular automata. *Applied Mathematics and Computation*, 186(1):193 – 202, 2007.
- 416 [42] WHO Ebola Response Team, Junerlyn Agua-Agum, Archchun Ariyarajah, Isobel M  
417 Blake, Anne Cori, Christl A Donnelly, Iaria Dorigatti, Christopher Dye, Tim Eckmanns,  
418 Neil M Ferguson, Robert A Fowler, Christophe Fraser, Tini Garske, Wes Hinsley, Thibaut  
419 Jombart, Harriet L Mills, Srinivas Murthy, Gemma Nedjati Gilani, Pierre Nouvellet,  
420 Louise Pelletier, Steven Riley, Dirk Schumacher, Anita Shah, and Maria D Van Kerkhove.

- 421 Ebola virus disease among children in West Africa. *N. Engl. J. Med.*, 372(13):1274–1277,  
422 March 2015.
- 423 [43] Joseph T Wu, Steven Riley, Christophe Fraser, and Gabriel M Leung. Reducing the impact  
424 of the next influenza pandemic using household-based public health interventions. *PLOS*  
425 *Medicine*, 3(9):1–9, 08 2006.
- 426 [44] Xiong Xiao, Albert Jan van Hoek, Michael G Kenward, Alessia Melegaro, and Mark Jit.  
427 Clustering of contacts relevant to the spread of infectious disease. *Epidemics*, 17:1–9,  
428 December 2016.
